# Supplementary material for: Spatially Ordered Arrays of Colloidal Inorganic Metal Halide Perovskite Nanocrystals via Controlled Droplet Evaporation in a Confined Geometry
Source: MDPI journal article supplement (doi:10.3390/ma14226824), 2021-11-12
Supplement: s1 [file s1]

# Spatially Ordered Arrays of Colloidal Inorganic Metal Halide Perovskite Nanocrystals via Controlled Droplet Evaporation in a Confined Geometry

Kwan Lee<sup>1,\*</sup>, Jonghyun Moon<sup>2</sup>, Jeonghwa Jeong<sup>2</sup> and Suck Won Hong<sup>2,\*</sup>

<sup>1</sup> Department of Advanced Materials Engineering, Kyung Sung University, Busan 48434, Republic of Korea

<sup>2</sup> Department of Cogno-Mechatronics Engineering, Department of Optics and Mechatronics Engineering, Pusan National University, Busan 46241, Republic of Korea

\* Correspondence: kwanlee@ks.ac.kr (K. L.); swhong@pusan.ac.kr (S. W. H.)

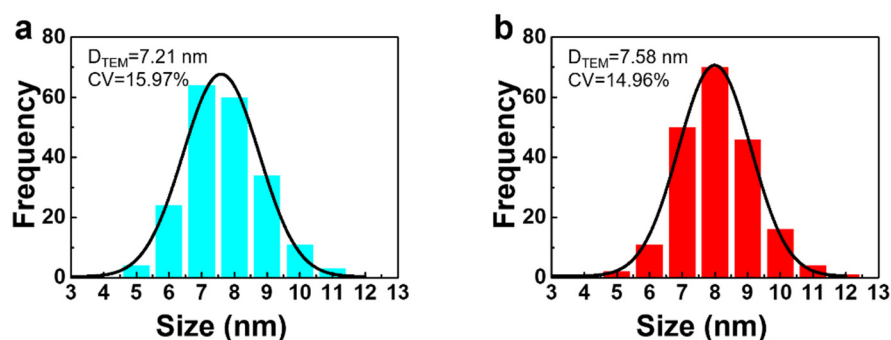

**Figure S1.** Size distribution of (a) CsPbBr<sub>3</sub> QDs and (b) CsPbI<sub>3</sub> QDs.

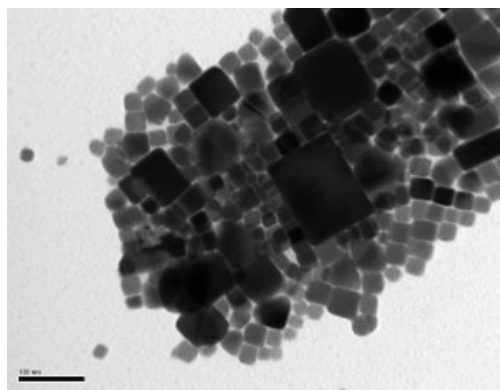

**Figure S2.** TEM image of CsPbBr<sub>3</sub> QDs integration and morphology change without excess zinc salts.

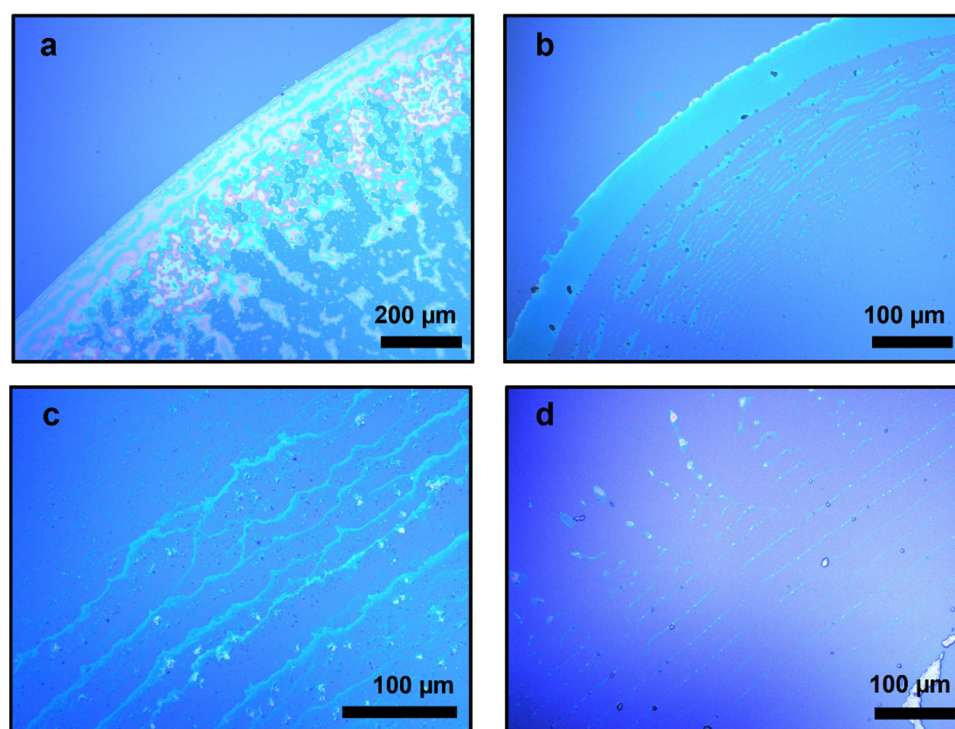

**Figure S3.** Control factors for highly ordered multiple ring pattern formation in sphere-on-flat geometry. (a) Poor purification for perovskite colloidal solution affects the delicate interaction within the two surfaces of the geometry. (b-c) Chaotic dissipated patterns were formed when the environmental temperature was higher than room temperature (i.e.,  $\sim 60^{\circ}\text{C}$ ). (d) lower concentration than the optimized condition ( $c = 0.2 \text{ mg mL}^{-1}$ ) led to tiny lines but disconnected ring patterns with fingering instabilities.

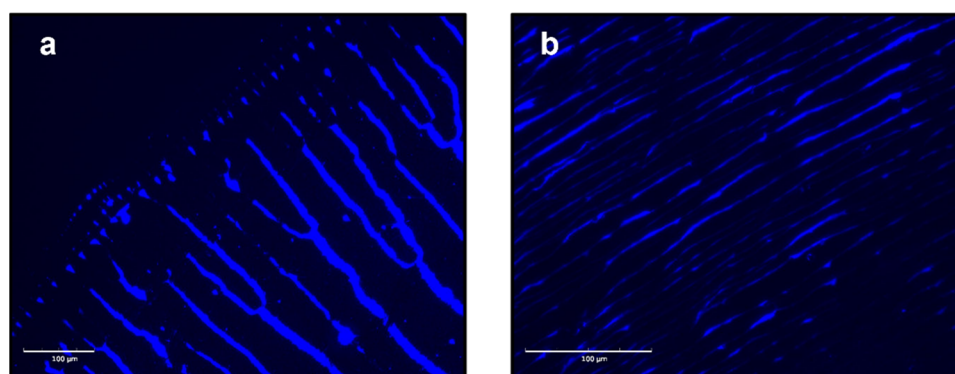

**Figure S4.** (a) Optical microscopic images show dot arrays and spoke-like structure formed at the early stage of the solvent evaporation. (b) A structural transition to the radially formed patterns of CsPbBr<sub>3</sub> QDs at the three-phase contact line by consecutive stick-slip motion when the meniscus gradually moves inward to the contact center.

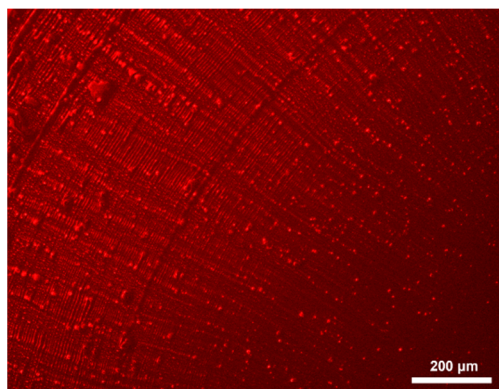

**Figure S5.** The typical fluorescence micrographic image of CsPbI<sub>3</sub> QDs rings with red emission, in which intermittently aggregated QDs in every single ring was observed on the scale of a millimeter.

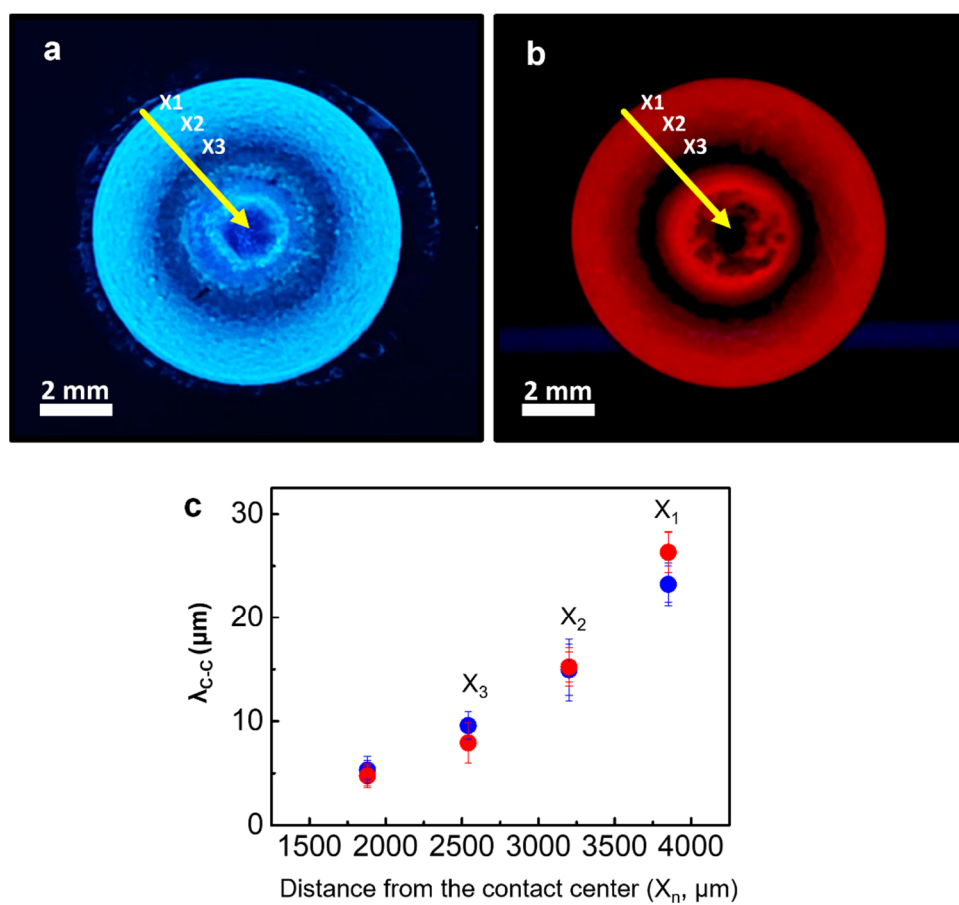

**Figure S6.** The digital images show blue emission and red-emission from the finite ring-patterned arrays of (a) CsPbBr<sub>3</sub> and (b) CsPbI<sub>3</sub> on the SiO<sub>2</sub>/Si flat surface under the excitation of a UV lamp (365 nm wavelength). (c) the  $\lambda_{c-c}$  identically decreases as toward the contact center when using the optimized colloidal concentration ( $c = 0.2 \text{ mg mL}^{-1}$ ) of CsPbBr<sub>3</sub> (blue dots) and CsPbI<sub>3</sub> (red dots) QDs.
